# Supplementary material for: Cab45 is required for Ca2+-dependent secretory cargo sorting at the trans-Golgi network
Source: PubMed Central journal article supplement — J Cell Biol. 2012 Dec 24;199(7):1057–66. doi: 10.1083/jcb.201207180 (PMC3529532; doi:10.1083/jcb.201207180), 2012-12-24
Supplement: supp_jcb.201207180_JCB_201207180_sm.pdf [file supp_jcb.201207180_JCB_201207180_sm.pdf]

Table S1. Mass spectrometry of the proteins eluted from GST-Cab45-bound beads

| Gene symbol                                                                                             | Unique peptides | Uniprot protein IDs | Mass    |
|---------------------------------------------------------------------------------------------------------|-----------------|---------------------|---------|
|                                                                                                         |                 |                     | D       |
| DSP isoform DPI of Desmoplakin                                                                          | 2               | IPI00013933         | 331,569 |
| HRNR Hornerin                                                                                           | 3               | IPI00398625         | 282,390 |
| FLG2 Filaggrin-2                                                                                        | 1               | IPI00397801         | 248,073 |
| GOLGA3 isoform 1 of Golgin subfamily A member 3                                                         | 2               | IPI00305267         | 167,252 |
| DSG1 Desmoglein-1                                                                                       | 2               | IPI00025753         | 113,784 |
| ATP1A1 isoform long of sodium/potassium-transporting ATPase subunit $\alpha$ -1                         | 5               | IPI00006482         | 112,824 |
| PGAP1 isoform 1 of GPI inositol-deacylase                                                               | 2               | IPI00178415         | 105,315 |
| RGPD8;RGPD5;RGPD6 RANBP2-like and GRIP domain-containing protein 7                                      | 1               | IPI00100787         | 103,269 |
| ATP2C1 isoform 2 of calcium-transporting ATPase type 2C member 1                                        | 1               | IPI00220473         | 96,897  |
| TRPC3 short transient receptor potential channel 3                                                      | 2               | IPI00748783         | 97,292  |
| AP1G1 cDNA FLJ46199 fis, clone TEST14007965, highly similar to AP-1 complex subunit $\gamma$ -1         | 2               | IPI00643591         | 94,080  |
| MOGS Mannosyl-oligosaccharide glucosidase                                                               | 2               | IPI00328170         | 91,918  |
| ECEL1 isoform 1 of Endothelin-converting enzyme-like 1                                                  | 1               | IPI00006735         | 87,736  |
| IFI16 isoform 1 of Gamma-interferon-inducible protein Irf-16                                            | 3               | IPI00003443         | 88,199  |
| PKP3 Plakophilin-3                                                                                      | 2               | IPI00026952         | 87,029  |
| TTC27 Tetratricopeptide repeat protein 27                                                               | 3               | IPI00183938         | 96,571  |
| SEC63 Translocation protein SEC63 homologue                                                             | 2               | IPI00218922         | 87,942  |
| PKP3 Plakophilin-3                                                                                      | 2               | IPI00026952         | 87,029  |
| PPP1R3F Protein phosphatase 1 regulatory subunit 3F                                                     | 1               | IPI00374568         | 80,376  |
| ALB Putative uncharacterized protein ALB                                                                | 3               | IPI00022434         | 71,658  |
| RPN1 Dolichyl-diphosphooligosaccharide-protein glycosyltransferase subunit 1 precursor                  | 4               | IPI00025874         | 72,733  |
| CLPTM1 isoform 2 of Cleft lip and palate transmembrane protein 1                                        | 2               | IPI00107357         | 77,909  |
| LOC646960 hypothetical protein LOC646960                                                                | 4               | IPI00022434         | 69,084  |
| TFRC Transferrin receptor protein 1                                                                     | 9               | IPI00022462         | 71,658  |
| ACSL3 Long chain fatty acid-CoA ligase 3                                                                | 2               | IPI00031397         | 80,368  |
| SLC7A5 Large neutral amino acids transporter small subunit 1                                            | 4               | IPI00008986         | 54,974  |
| SLC1A5 Neutral amino acid transporter B(0)                                                              | 3               | IPI00019472         | 57,909  |
| SLC25A13 Calcium-binding mitochondrial carrier protein Aralar2                                          | 1               | IPI00007084         | 52,888  |
| CANX cDNA FLJ55574, highly similar to Calnexin                                                          | 8               | IPI00020984         | 71,458  |
| TGOLN2 Isoform TGN51 of Trans-Golgi network integral membrane protein 2                                 | 1               | IPI00012545         | 51,082  |
| POR NADPH-cytochrome P450 reductase                                                                     | 3               | IPI00470467         | 76,641  |
| SLC3A2 isoform 2 of 4F2 cell-surface antigen heavy chain                                                | 8               | IPI00027493         | 57,909  |
| SCARB2 lysosome membrane protein 2                                                                      | 1               | IPI00217766         | 54,255  |
| ICAM1 intercellular adhesion molecule 1                                                                 | 3               | IPI00008494         | 57,909  |
| ARCN1 Coatomer subunit delta variant 2                                                                  | 2               | IPI00298520         | 61,587  |
| TRIM32 tripartite motif-containing protein 32                                                           | 1               | IPI00297113         | 71,942  |
| CCT5 T-complex protein 1 subunit epsilon                                                                | 2               | IPI00010720         | 59,633  |
| ARAF Putative uncharacterized protein ARAF                                                              | 2               | IPI00020578         | 67,882  |
| DDX5 probable ATP-dependent RNA helicase DDX5                                                           | 2               | IPI00017617         | 73,198  |
| PLK1 Serine/threonine protein kinase PLK1                                                               | 1               | IPI00021248         | 68,212  |
| TBRG4 cDNA FLJ56153, highly similar to <i>Homo sapiens</i> transforming growth factor $\beta$ regulator | 2               | IPI00329625         | 71,812  |
| PDLIM5 PDZ and LIM domain protein 5                                                                     | 2               | IPI00007935         | 63,962  |
| TRIM29 isoform Alpha of Tripartite motif-containing protein 29                                          | 1               | IPI00073096         | 65,793  |
| LOC442497;SLC3A2 Isoform 2 of 4F2 cell-surface antigen heavy chain                                      | 1               | IPI00027493         | 57,909  |
| UTP18 U3 small nucleolar RNA-associated protein 18 homologue                                            | 1               | IPI01015840         | 68,212  |
| SERPINA12 Serpin A12                                                                                    | 1               | IPI00219476         | 47,145  |
| CCT8 59 kD protein                                                                                      | 10              | IPI00302925         | 59,440  |
| ATP5A1 ATP synthase subunit alpha                                                                       | 5               | IPI00440493         | 59,714  |
| VIM Vimentin                                                                                            | 7               | IPI00418471         | 53,652  |
| PHGDH D-3-phosphoglycerate dehydrogenase                                                                | 3               | IPI00011200         | 56,614  |
| CCT3 chaperonin containing TCP1, subunit 3 isoform b                                                    | 6               | IPI00290770         | 60,424  |
| CCT4 T-complex protein 1 subunit $\delta$                                                               | 5               | IPI00302927         | 53,619  |
| CCT7 T-complex protein 1 subunit $\eta$                                                                 | 3               | IPI00018465         | 59,329  |
| ARCN1 Coatomer subunit delta variant 2                                                                  | 1               | IPI00298520         | 57,888  |
| CCT6A T-complex protein 1 subunit $\zeta$                                                               | 2               | IPI00027626         | 57,988  |
| SBSN suprabasin isoform 1 precursor                                                                     | 2               | IPI00947285         | 60,505  |
| FARSA Phenylalanyl-tRNA synthetase $\alpha$ chain                                                       | 2               | IPI00031820         | 57,528  |
| TOR1AIP1 putative uncharacterized protein TOR1AIP1                                                      | 1               | IPI00792065         | 66,279  |
| SACM1L phosphatidylinositolide phosphatase SAC1                                                         | 3               | IPI00022275         | 66,924  |
| SLC27A4 long-chain fatty acid transport protein 4                                                       | 1               | IPI00412147         | 72,018  |
| PKLR isoform R-type of Pyruvate kinase isozymes R/L                                                     | 1               | IPI00792065         | 50,944  |

Table S1. Mass spectrometry of the proteins eluted from GST-Cab45-bound beads (Continued)

| Gene symbol                                                                       | Unique peptides | Uniprot protein IDs | Mass   |
|-----------------------------------------------------------------------------------|-----------------|---------------------|--------|
| PPP1R7 isoform 1 of protein phosphatase 1 regulatory subunit 7                    | 1               | IPI00027165         | 66,942 |
| ATP5B ATP synthase subunit $\beta$ , mitochondrial                                | 7               | IPI00303476         | 41,539 |
| FAR1 fatty acyl-CoA reductase 1                                                   | 7               | IPI00478838         | 38,354 |
| RUVBL2 RuvB-like 2                                                                | 3               | IPI00009104         | 50,196 |
| EEF1A1 elongation factor 1- $\alpha$                                              | 4               | IPI00396485         | 47,839 |
| PLIN3 mannose 6 phosphate receptor binding protein 1 isoform 3                    | 5               | IPI00106668         | 45,775 |
| HLA-A HLA class I histocompatibility antigen, A-68 $\alpha$ chain                 | 2               | IPI00472882         | 40,378 |
| SLC2A1 Solute carrier family 2, facilitated glucose transporter member 1          | 1               | IPI00220194         | 54,049 |
| SDF4 isoform 1 of 45 kD calcium-binding protein                                   | 11              | IPI00106646         | 41,780 |
| SLC3A2 isoform 2 of 4F2 cell-surface antigen heavy chain                          | 6               | IPI00027493         | 51,125 |
| DHCR24 24-dehydrocholesterol reductase                                            | 3               | IPI00016703         | 60,062 |
| CYP1B1 cytochrome P450 1B1                                                        | 2               | IPI00003451         | 60,807 |
| ATP5C1 isoform Heart of ATP synthase subunit $\gamma$                             | 2               | IPI00440493         | 59,714 |
| PTGES2 Prostaglandin E synthase 2                                                 | 1               | IPI00303568         | 41,982 |
| NCLN isoform 1 of Nicalin                                                         | 2               | IPI00470649         | 62,935 |
| SPTLC1 Serine palmitoyltransferase 1                                              | 3               | IPI00005745         | 52,710 |
| PTPN1 Tyrosine-protein phosphatase non-receptor type 1                            | 1               | IPI00297261         | 49,935 |
| DHCR24 24-dehydrocholesterol reductase                                            | 2               | IPI00016703         | 60,062 |
| TRIP13 isoform 1 of Thyroid receptor-interacting protein 13                       | 3               | IPI00003505         | 48,520 |
| ATXN10 Ataxin-10                                                                  | 2               | IPI01019005         | 50,087 |
| PSMC4 isoform 1 of 26S protease regulatory subunit 6B                             | 1               | IPI00020042         | 52,710 |
| SEC61A2 Sec61 $\alpha$ form 2 isoform b                                           | 1               | IPI00182313         | 49,561 |
| HLA-C HLA class I histocompatibility antigen, Cw-12 $\alpha$ chain                | 4               | IPI00743716         | 40,860 |
| HLA-A HLA class I histocompatibility antigen, A-68 $\alpha$ chain                 | 2               | IPI00472882         | 53,455 |
| SERPINH1 Serpin H1                                                                | 7               | IPI00032140         | 46,411 |
| DNAJB12 DnaJ homologue subfamily B member 12                                      | 6               | IPI00179187         | 41,834 |
| MAT2A S-adenosylmethionine synthetase isoform type-2                              | 1               | IPI00010157         | 43,633 |
| SLC16A1 Monocarboxylate transporter 1                                             | 3               | IPI00024650         | 53,923 |
| DDOST Dolichyl-diphosphooligosaccharide-protein glycosyltransferase 48 kD subunit | 1               | IPI00297084         | 50,796 |
| AHSG 39 kD protein                                                                | 1               | IPI00022431         | 39,325 |
| RCN1 Reticulocalbin-1                                                             | 1               | IPI00015842         | 38,866 |
| CD44 Isoform 12 of CD44 antigen                                                   | 1               | IPI00297160         | 39,391 |
| SLC25A5 ADP/ATP translocase 2                                                     | 4               | IPI00007188         | 32,874 |
| SLC25A6 ADP/ATP translocase 3                                                     | 3               | IPI00291467         | 32,845 |
| SLC25A3 isoform A of Phosphate carrier protein                                    | 3               | IPI00022202         | 40,069 |
| CD276 isoform 2 of CD276 antigen                                                  | 1               | IPI00019275         | 33,770 |
| SLC25A11 mitochondrial 2-oxoglutarate/malate carrier protein                      | 2               | IPI00219729         | 34,040 |
| APOA1 Apolipoprotein A                                                            | 1               | IPI00853525         | 27,891 |
| TTC1 Tetratricopeptide repeat protein 1                                           | 1               | IPI00016912         | 33,505 |
| MARCKS myristoylated alanine-rich C-kinase substrate                              | 2               | IPI00219301         | 31,536 |
| COPE $\epsilon$ subunit of coatomer protein complex isoform b                     | 3               | IPI00399318         | 28,779 |
| SCAMP3 isoform 1 of Secretory carrier-associated membrane protein 3               | 3               | IPI00306382         | 38,262 |
| ERGIC1 cDNA FLJ56280, highly similar to ER-Golgi intermediate compartment         | 1               | IPI00003635         | 26,242 |
| PHB Prohibitin                                                                    | 5               | IPI00017334         | 29,786 |
| PHB2 Prohibitin-2                                                                 | 6               | IPI00027252         | 33,276 |
| GNB2L1 Guanine nucleotide-binding protein subunit $\beta$ -2-like 1               | 4               | IPI00848226         | 35,055 |
| EMD Emerin                                                                        | 3               | IPI00032003         | 28,976 |
| MLEC Malectin                                                                     | 2               | IPI00029046         | 32,214 |
| BSG Isoform 2 of Basigin                                                          | 1               | IPI00019906         | 29,203 |
| VAPA Vesicle-associated membrane protein-associated protein A                     | 1               | IPI00170692         | 27,875 |
| CLCF1 Cardiotrophin-like cytokine factor 1                                        | 2               | IPI00294405         | 25,176 |
| EDN3 endothelin 3 isoform 2 preproprotein                                         | 1               | IPI00410367         | 25,454 |
| FAM189A2 C9orf61 protein                                                          | 1               | IPI00180417         | 18,790 |
| ARFIP2 Arfaptin-2                                                                 | 1               | IPI00021257         | 37,832 |
| YWHAE 14-3-3 protein epsilon                                                      | 1               | IPI00000816         | 29,155 |
| LYZ LysC                                                                          | 3               | IPI00019038         | 16,537 |
| DCD Dermcidin                                                                     | 4               | IPI00027547         | 11,277 |
| BASP1 Isoform 1 of Brain acid soluble protein 1                                   | 2               | IPI00299024         | 22,680 |
| Apolipoprotein E receptor 2 (fragment)                                            | 1               | IPI00383266         | 12,298 |

GST and GST Cab45 were extracted from *E. coli* and purified on GST beads as explained in Fig. 5. The respective preparations of beads were incubated with HeLa cell lysate for 4 h at 4°C, washed extensively, and incubated with SDS-PAGE sample buffer to release the bound proteins, which were then analyzed by SDS-PAGE. The gels were stained with Coomassie blue and the protein bands were excised and analyzed by mass spectrometry.
